# Supplementary material for: Serial Changes in Body Composition and the Association with Disease Activity during Treatment in Patients with Crohn’s Disease
Source: MDPI journal article supplement (doi:10.3390/diagnostics12112804), 2022-11-15
Supplement: s1 [file s1]

Supplementary Table S1. Clinical characteristics of study population (n=71).

| Variables                           | N(%)                |
|-------------------------------------|---------------------|
| Sex (%)                             |                     |
| F                                   | 23 (32.4)           |
| M                                   | 48 (67.6)           |
| Age                                 | 29.8 ± 11.3         |
| Follow-up period (mo, median [IQR]) | 144.0 [97.0, 180.5] |
| Prior surgery (%)                   | 6 ( 8.6)            |
| Prior perianal surgery (%)          | 17 (24.3)           |
| Smoking (%)                         | 25 (35.8)           |
| Baseline sarcopenia (%)             | 38 (55.1)           |
| Baseline CT activity (%)            |                     |
| Normal                              | 5 ( 7.0)            |
| Mild                                | 2 ( 2.8)            |
| Moderate                            | 16 (22.5)           |
| Severe                              | 48 (67.6)           |
| Baseline SES-CD score (%)           |                     |
| Normal                              | 11 (16.2)           |
| Mild/Moderate                       | 32 (47.1)           |
| Severe                              | 25 (36.8)           |
| Change of IMS to biologics (%)      | 53 (82.8)           |
| Change of biologics (%)             | 24 (40.7)           |
| Dose optimization (%)               | 26 (43.3)           |
| Remission                           | 24 (34.3)           |
| Surgery                             | 15 (21.1)           |
| Time to surgery (mo)                | 64.5 ± 68.6         |
| Complication (%)                    |                     |
| None                                | 50 (70.4)           |
| Stenosing                           | 16 (22.5)           |
| Penetrating                         | 1 (1.4)             |
| Combined stenosing and penetrating  | 4 (5.6)             |

Supplementary Table S2. Association between VFA/SFA ratio with CT activity scores and SES-CD scores.

| Characteristics     | Beta (95% CI)       | p-value |
|---------------------|---------------------|---------|
| time                | 0.03 (0.01~0.06)    | 0.004   |
| Sex                 |                     |         |
| F                   | -                   |         |
| M                   | 0.28(0.09~0.47)     | 0.005   |
| SES-CD              |                     |         |
| Normal              | -                   |         |
| Mild/moderate       | 0.03 (-0.1~ 0.16)   | 0.68    |
| Severe              | 0.01 (-0.13~ 0.15)  | 0.86    |
| Time * SES-CD       |                     |         |
| Time* mild/moderate | -0.03 (-0.06~ 0.00) | 0.032   |
| Time* severe        | 0.00 (-0.04~ 0.05)  | 0.89    |

| Characteristics    | Beta (95% CI)      | p-value |
|--------------------|--------------------|---------|
| time               | 0.05 (0.01~0.08)   | 0.02    |
| Sex                |                    |         |
| F                  | -                  |         |
| M                  | 0.33(0.13~0.54)    | 0.002   |
| CT activity        |                    |         |
| Normal             | -                  |         |
| Mild               | 0.09(-0.24~0.42)   | 0.59    |
| Moderate           | 0.08(-0.16~0.31)   | 0.51    |
| Severe             | 0.15 (-0.07~0.37)  | 0.19    |
| Time * CT activity |                    |         |
| 2-5y f/u           | 0.0 (-0.06~ 0.06)  | 0.88    |
| 5-8y f/u           | -0.04 (-0.08~0.01) | 0.15    |
| >8y f/u            | -0.04 (-0.08~0.00) | 0.062   |

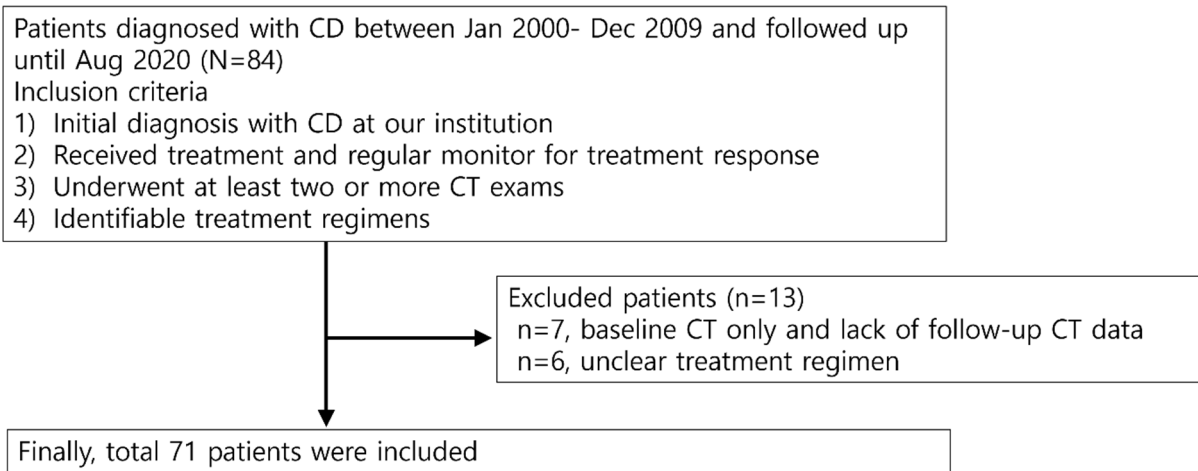

Supplementary Figure S1. Flow chart of patient selection.

### 1) CT activity grades

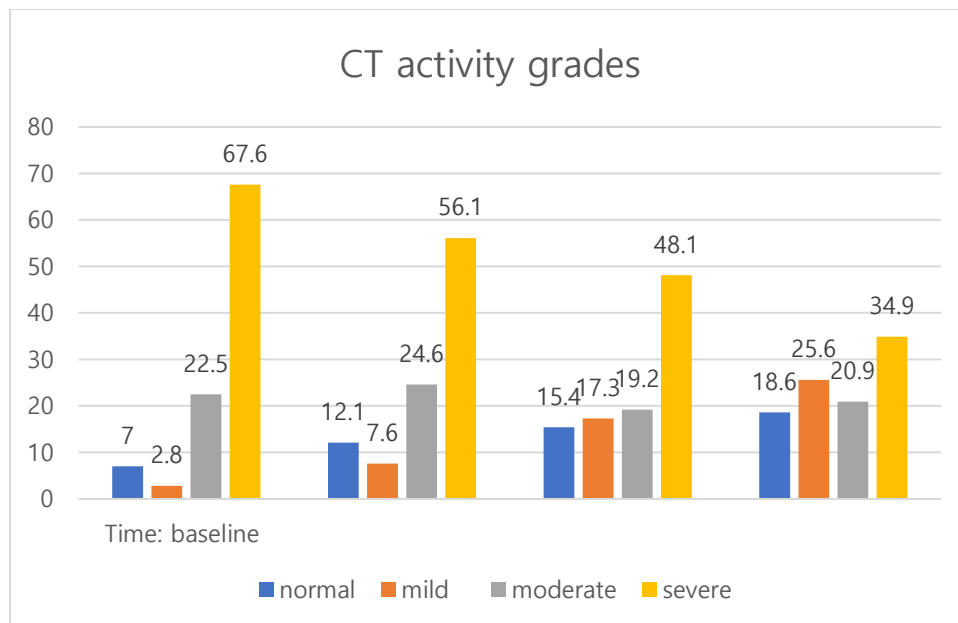

### 2) SES-CD scores

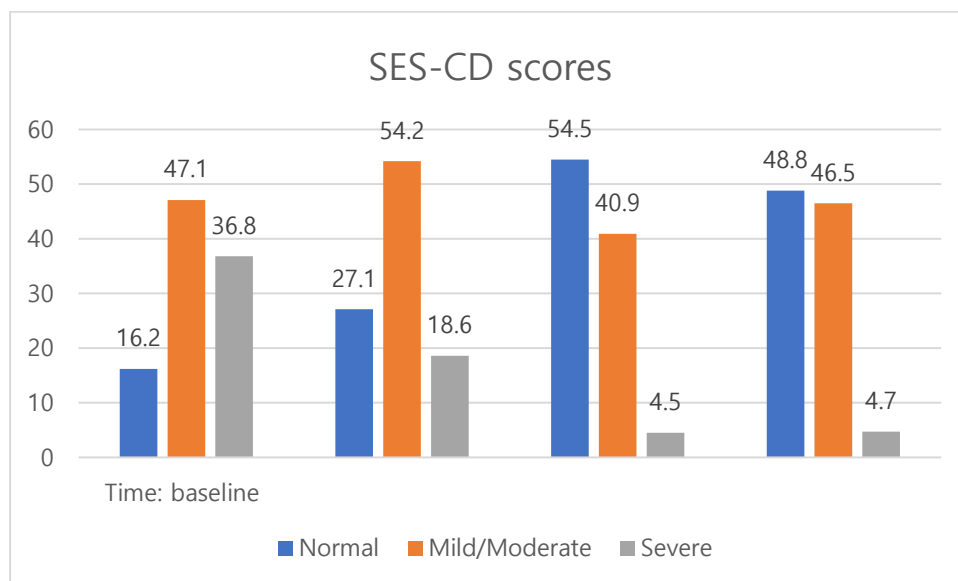

Supplementary Figure S2. Changes in disease activity.
